# Supplementary material for: Indonesian Ginger (Bangle) Extract Promotes Neurogenesis of Human Neural Stem Cells through WNT Pathway Activation
Source: MDPI journal article supplement (doi:10.3390/ijms21134772), 2020-07-05
Supplement: s1 [file s1]

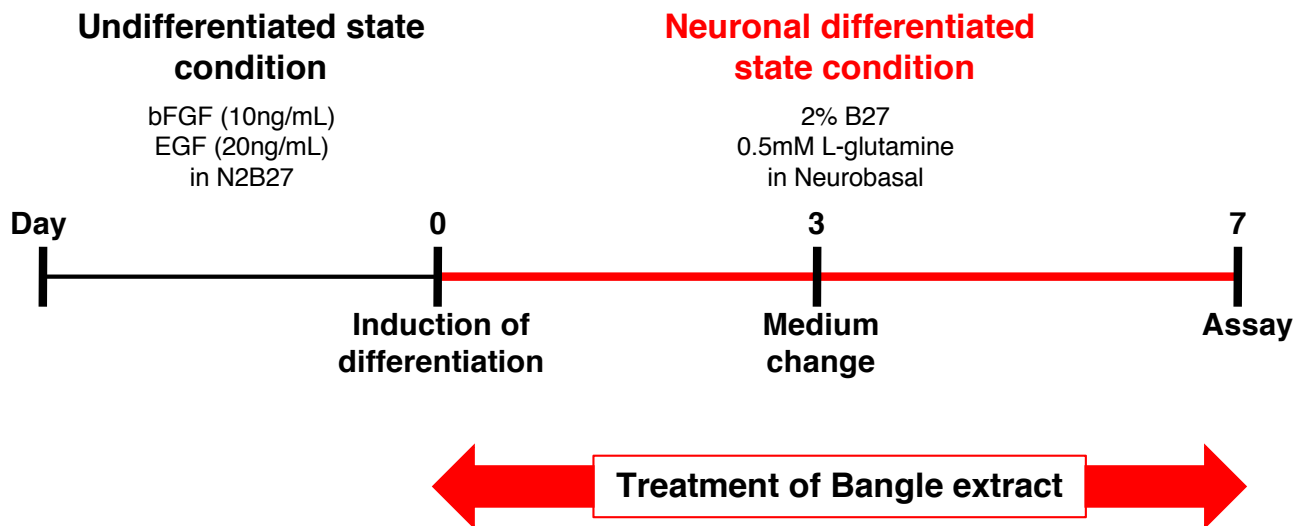

Fig. S1 Diagram depicting the cell culture and neuronal differentiation schedule

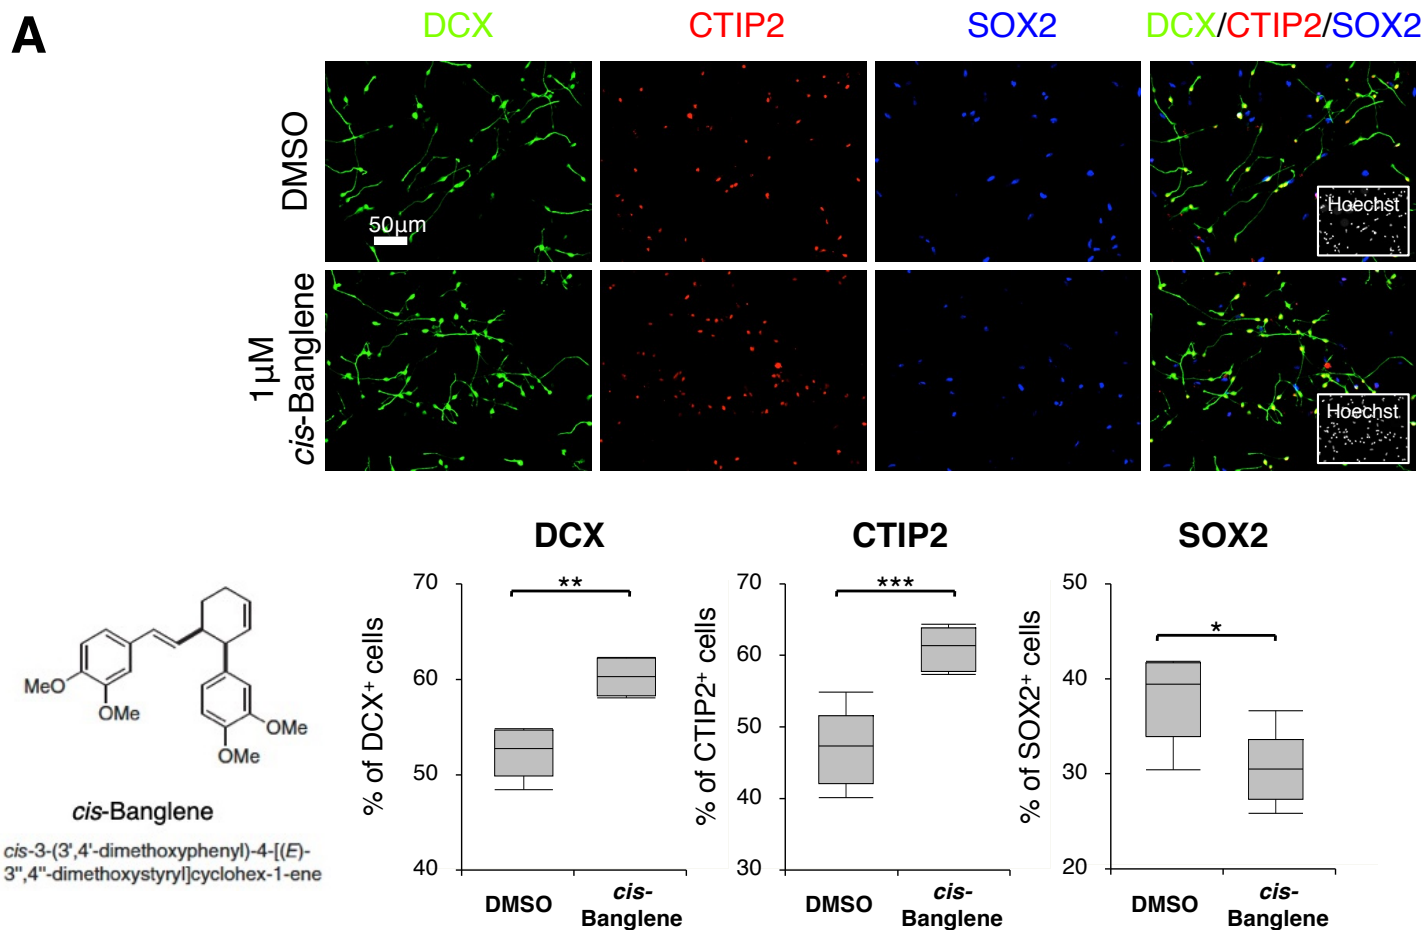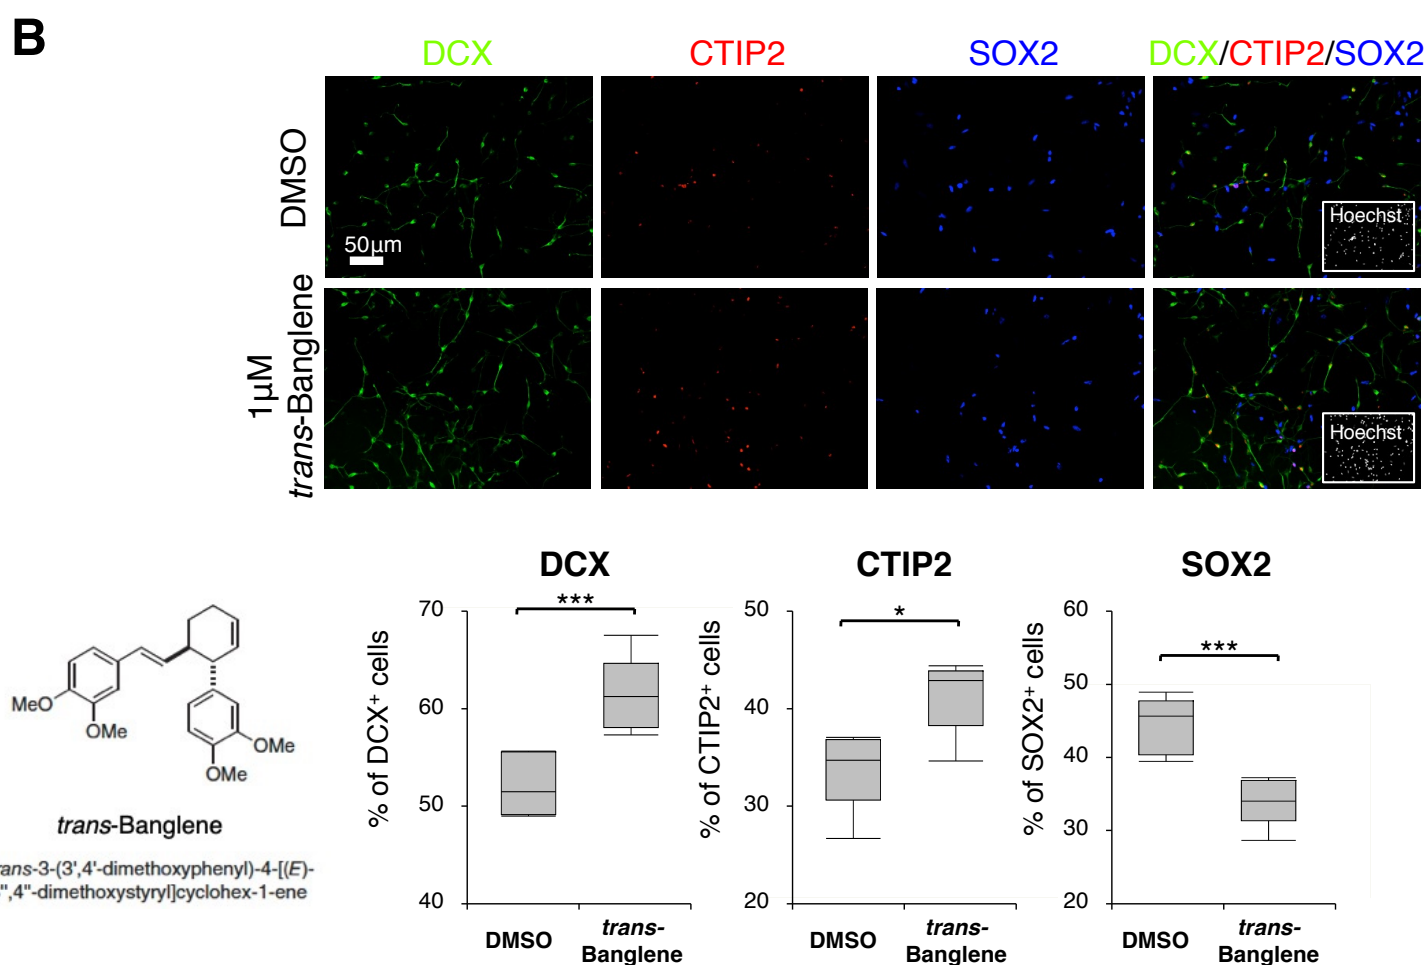

Fig. S2 *cis*-, *trans*-Banglene promote the neuronal differentiation of hfNSCs

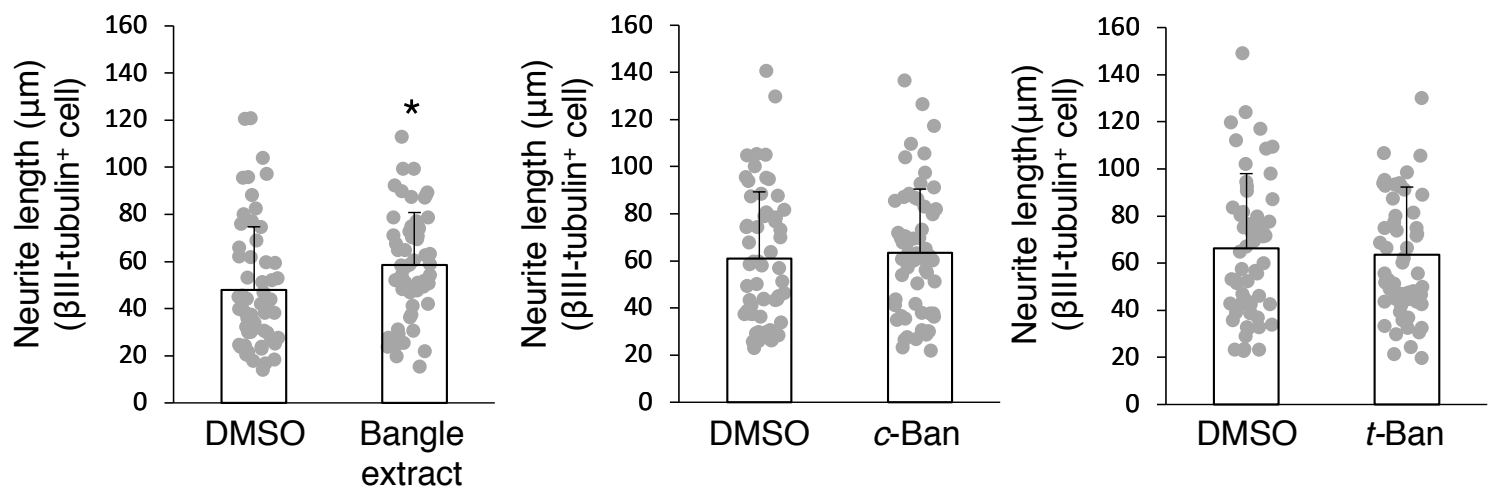

Fig. S3 Promotion of neurite outgrowth of Banglone-treated cell disappears at 7 days after neuronal differentiation of hfNSCs

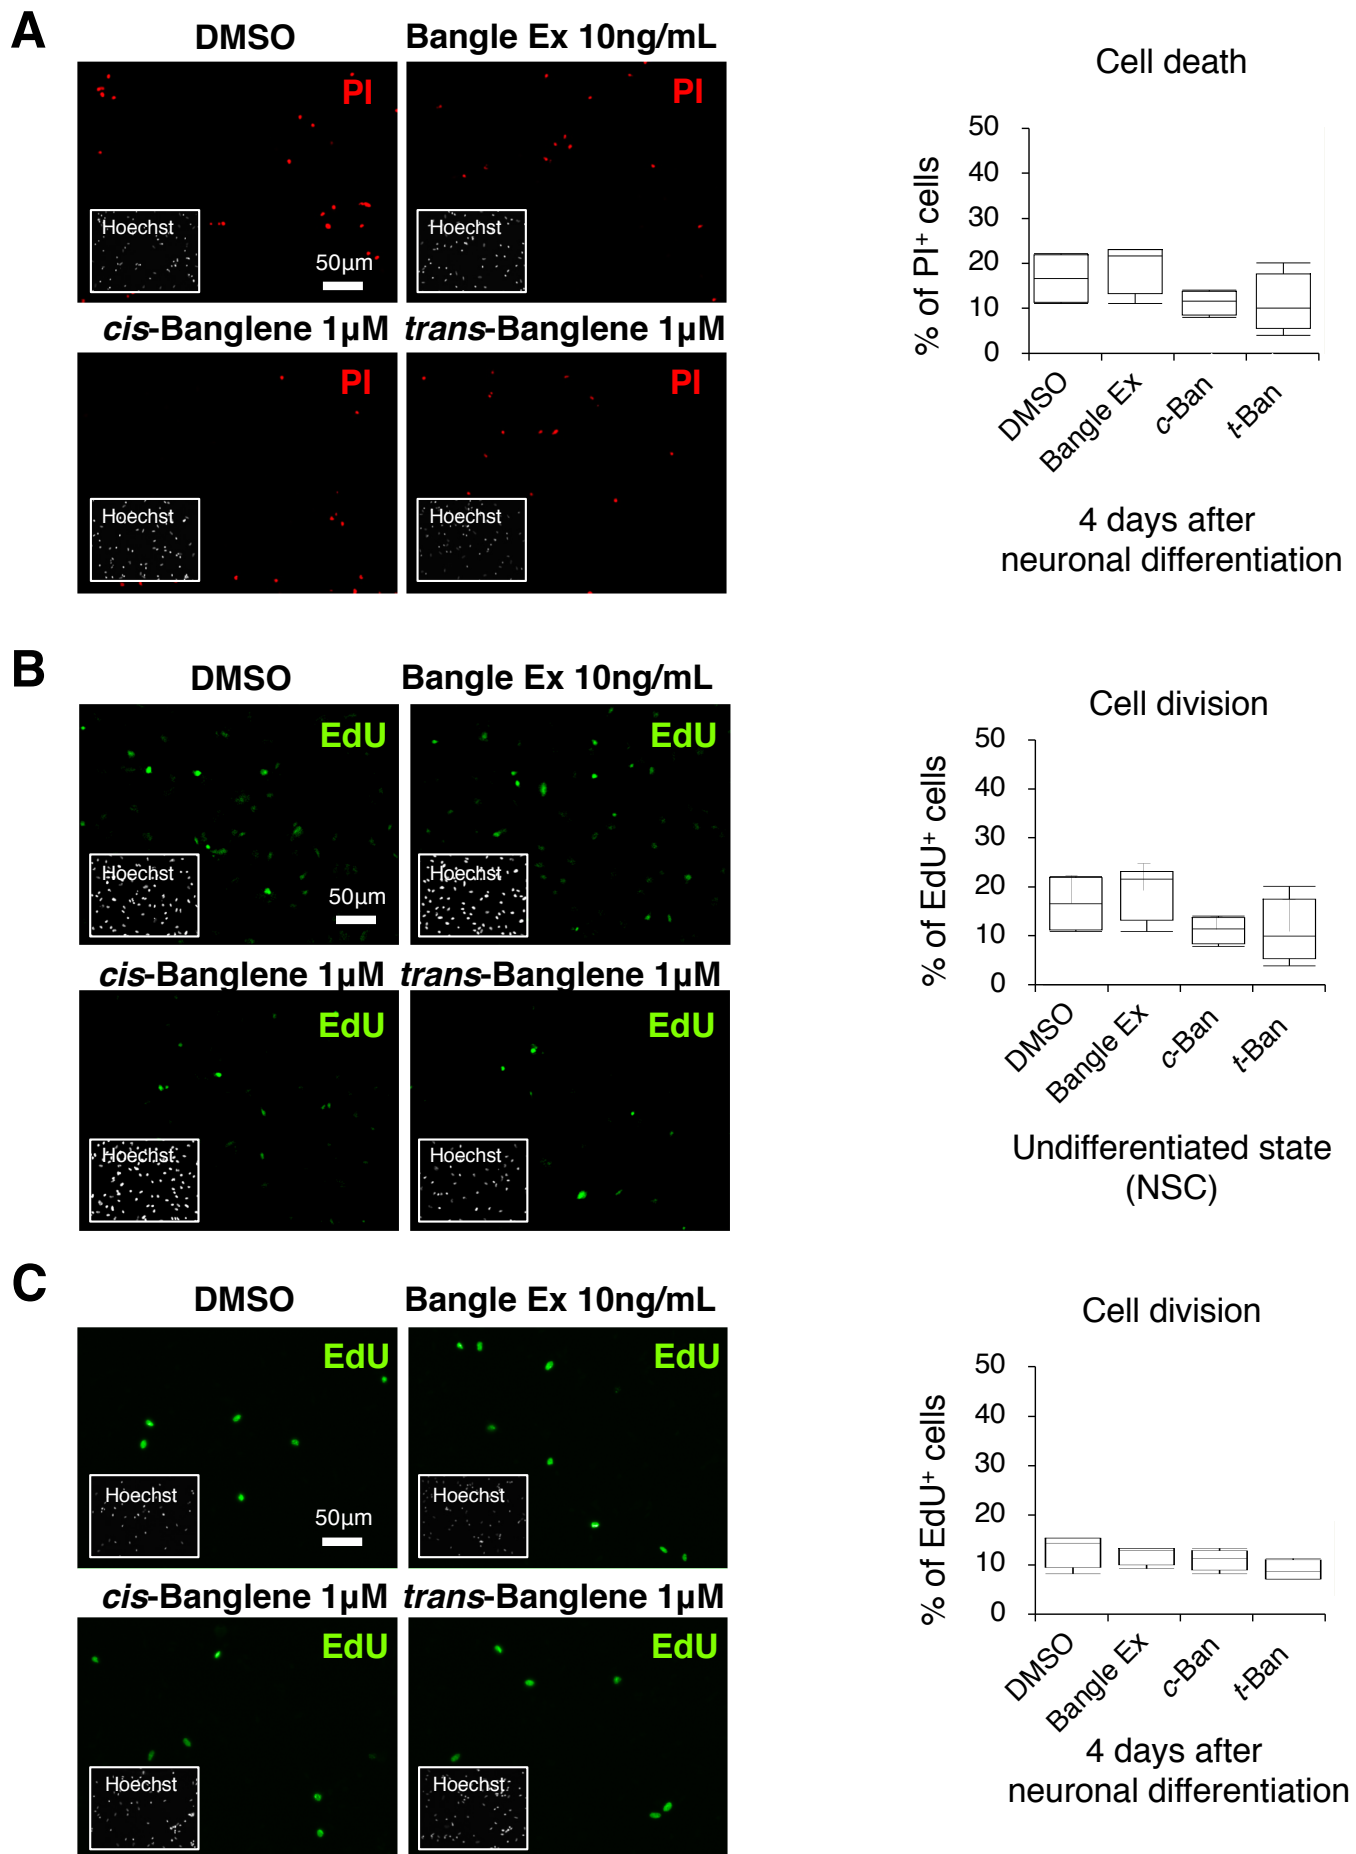

Fig. S4 Assessments of cell death and cell division in cells treated with Bangle extract and Banglone

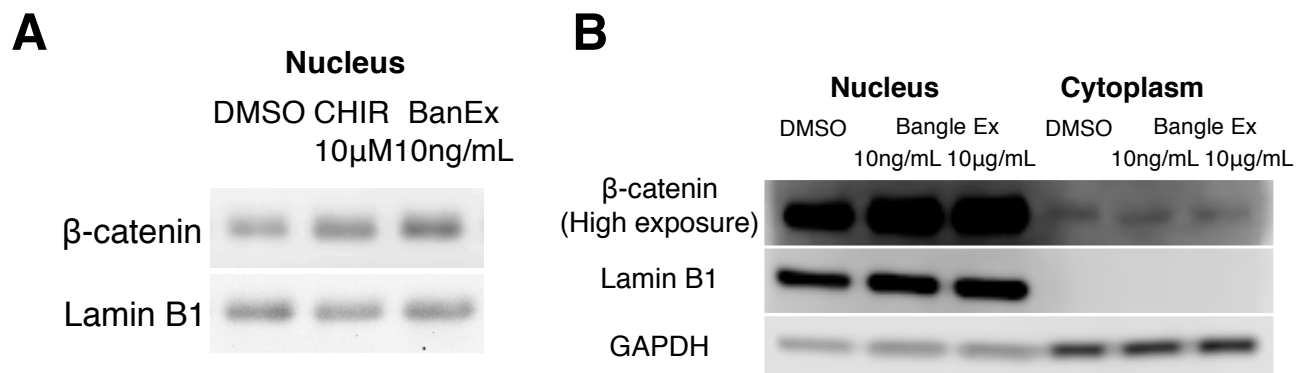

Fig. S5 Treatment with the WNT signaling activator CHIR99021 promotes  $\beta$ -catenin nuclear translocation.

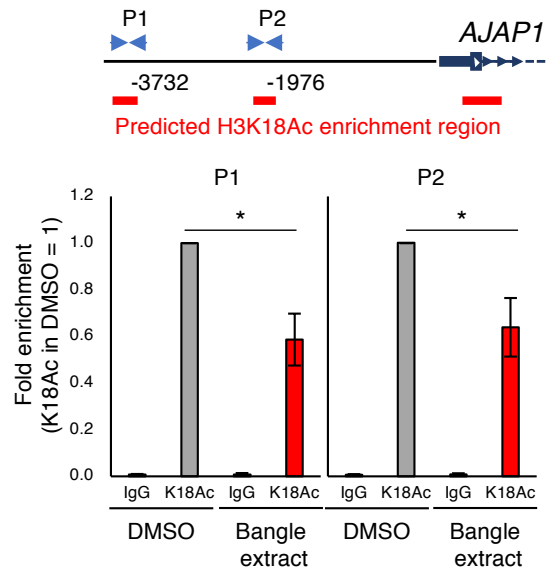

Fig. S6 Treatment Bangle extract decreased H3K18Ac enrichment in the proximity to *AJAP1* gene.

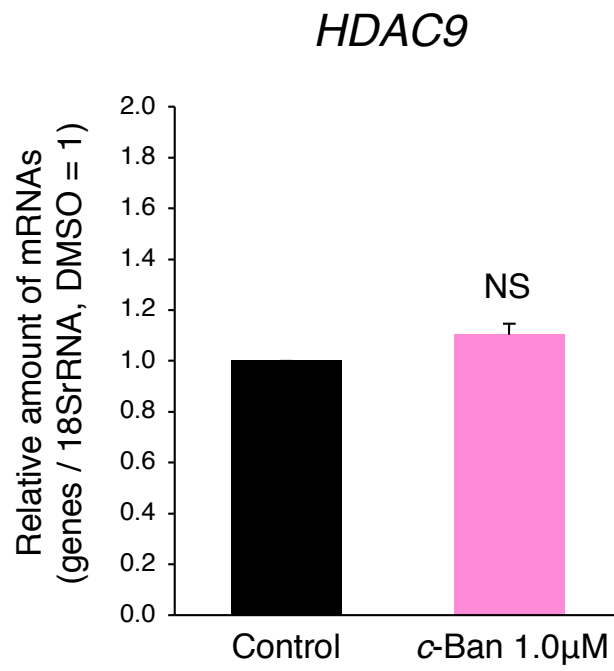

Fig. S7 The expression levels of *HDAC9* was not significantly increased by *c*-Banglene treatment.

| Common Up-regulated Genes<br>(Bangle Ex/DMSO > 1.3-fold; c-Ban/DMSO > 1.3-fold; P< 0.05) |              |         |               |             |          |
|------------------------------------------------------------------------------------------|--------------|---------|---------------|-------------|----------|
| ACSL6                                                                                    | CRB1         | GADD45G | KCNIP3        | MFNG        | RMST     |
| ATP2B4                                                                                   | DACH1        | GCNT1   | LAMP5         | MOB3B       | SERPING1 |
| BEST3                                                                                    | <b>DCX</b>   | GFAP    | LINC00240     | MTRR        | SHD      |
| C11orf87                                                                                 | <b>DLX2</b>  | GPR88   | LIX1          | <b>MYCN</b> | SLMAP    |
| CABP7                                                                                    | EFNA1        | HELT    | lnc-CD99L2-1  | NMU         | SNCAIP   |
| CASC15                                                                                   | <b>EOMES</b> | HES5    | lnc-DYNC1I2-1 | PCDH8       | TESC     |
| CASZ1                                                                                    | FAM46B       | HYDIN   | lnc-SLC7A7-1  | PRODH       | TOX2     |
| CDON                                                                                     | FEZF2        | IGFBPL1 | LOC101929759  | RAB3C       | VCAM1    |
| CNGA3                                                                                    | FRMD4B       | KCNG1   | LOC115110     | RGS16       |          |

| Common Down-regulated Genes<br>(Bangle Ex/DMSO < 0.7-fold; c-Ban/DMSO < 0.7-fold; P< 0.05) |              |
|--------------------------------------------------------------------------------------------|--------------|
| <b>AJAP1</b>                                                                               | LGI2         |
| CABLES1                                                                                    | lnc-MLXIP-1  |
| <b>GBX2</b>                                                                                | LOC100130938 |
| KCNA2                                                                                      | SPRY4        |

Table S1 Common up- and down-regulated genes by treatment with Bangle extract and c-Banglene

Table S2. List of differentially expressed genes.  
See excel file Table S2

|                                     | Antibody Target               | Species | Supplier      | Cat.No.  | RRID        | Dilution |
|-------------------------------------|-------------------------------|---------|---------------|----------|-------------|----------|
| Primary Abs<br>for immunostaining   | βIII-tubulin                  | Mouse   | R&D systems   | MAB1195  | AB_357520   | 1:5000   |
|                                     | β-catenin                     | Rabbit  | Abcam         | ab32572  | AB_725966   | 1:200    |
|                                     | CTIP2                         | Rat     | Abcam         | ab18465  | AB_2064130  | 1:1000   |
|                                     | DCX                           | Chicken | Abcam         | ab153668 | AB_2728759  | 1:200    |
|                                     | SOX2                          | Rabbit  | Abcam         | ab97959  | AB_2341193  | 1:200    |
| Secondary Abs<br>for immunostaining | CF488 Donkey anti-mouse IgG   | Donkey  | Biotium       | #20014   | AB_10853131 | 1:500    |
|                                     | CF568 Donkey anti-rabbit IgG  | Donkey  | Biotium       | #20098   | AB_10853318 | 1:500    |
|                                     | CF647 Donkey anti-rabbit IgG  | Donkey  | Biotium       | #20047   | AB_10853792 | 1:500    |
|                                     | CF488 Donkey anti-chicken IgY | Donkey  | Biotium       | #20166   | AB_10854387 | 1:500    |
|                                     | CF568 Donkey anti-rat IgG     | Donkey  | Biotium       | #20092   | AB_10855000 | 1:500    |
| Primary Abs<br>for WB               | β-catenin                     | Rabbit  | Abcam         | ab32572  | AB_725966   | 1:5000   |
|                                     | LaminB1                       | Rabbit  | MBL           | PM064    | AB_10693917 | 1:2000   |
|                                     | H3K18Ac                       | Rabbit  | Abcam         | ab1191   | AB_298692   | 1:500    |
|                                     | H3K4me1                       | Rabbit  | Abcam         | ab8895   | AB_306847   | 1:500    |
|                                     | Histone H3                    | Rabbit  | Abcam         | ab1791   | AB_302613   | 1:5000   |
| Secondary Abs<br>for WB             | GAPDH                         | Mouse   | EMD Millipore | MAB374   | AB_2107445  | 1:4000   |
|                                     | HRP Goat anti-Mouse IgG       | Goat    | Abcam         | ab97023  | AB_10679675 | 1:5000   |
|                                     | HRP Goat anti-Rabbit IgG      | Goat    | Abcam         | ab97051  | AB_10679369 | 1:5000   |

Table S3 Primary and secondary antibody specifications

| Gene             | Forward primer sequence (5'-3') | Reverse primer sequence (5'-3') |
|------------------|---------------------------------|---------------------------------|
| hTBR2            | CCACTGCCCCACTACAATGTG           | TTCCCGAATGAAATCTCCTG            |
| hDCX             | GACAGCCCCACTCTTTTGAGC           | TGGGTTTCCCTTCATGACTC            |
| hDLX2            | GCACATGGGTTCCTACCAGT            | TCCTTCTCAGGCTCGTTGTT            |
| hN-MYC           | CTTCGGTCCAGCTTTCTCAC            | GTCCGAGCGTGTTCAATTTT            |
| hAXIN2           | CCTGCCACCAAGACCTACAT            | CTTCATTCAAGGTGGGGAGA            |
| hEGFR            | CAGAGTGATGTCTGGAGCTACG          | GGGAGGCGTTCTCCTTTCT             |
| hAJAP1           | GTTAGCACAACGGAGCCTTC            | GATGATCTGATGGACAGCCA            |
| hGBX2            | AAAGAGGGGCTCGCTGCTC             | GGTCGTCTTCCACCTTTGAC            |
| hHDAC9           | GCAACAGGTAATAGGCAAAG            | CACTGAACTCAAATCATAGAG           |
| h18SrRNA         | GATATGCTCATGTGGTGTTG            | AATCTTCTTCAGTCGCTCCA            |
| h $\beta$ -actin | TTCTACAATGAGCTGCGTGTG           | GGGGTGTTGAAGGTCTCAAA            |

Table S4 List of gene specific primers for qRT-PCR

| Gene          | Forward primer sequence (5'-3') | Reverse primer sequence (5'-3') |
|---------------|---------------------------------|---------------------------------|
| hGBX2_ChIP_1  | GATCTGGTGGTGAGGGTGTG            | CAGCATAGACTCGCTGATCG            |
| hGBX2_ChIP_2  | TGTATTTGCCATGGAACCAA            | GGACCTACAGCGAGCAACC             |
| hGBX2_ChIP_3  | GGGATCTCCAGGCTCTATCC            | AAGGAAGGAATGGAGCGTTT            |
| hGBX2_ChIP_4  | ATCCGGAGGAGGAAGCAC              | AGCCTGTCGCCTAGGACTG             |
| hAJAP1_ChIP_1 | AATGGCCTCAGAGAGCTTCA            | GTGGAAAGTTCTTCCGGTCA            |
| hAJAP1_ChIP_2 | GAGAGGCTCTAGGGGACGAT            | GACCCTCGGTCTCCTCATCT            |

Table S5 List of gene specific primers for ChIP assay
